# Supplementary material for: Identification of QTLs for Grain Protein Content in Russian Spring Wheat Varieties
Source: MDPI journal article supplement (doi:10.3390/plants11030437), 2022-02-05
Supplement: s1 [file s1]

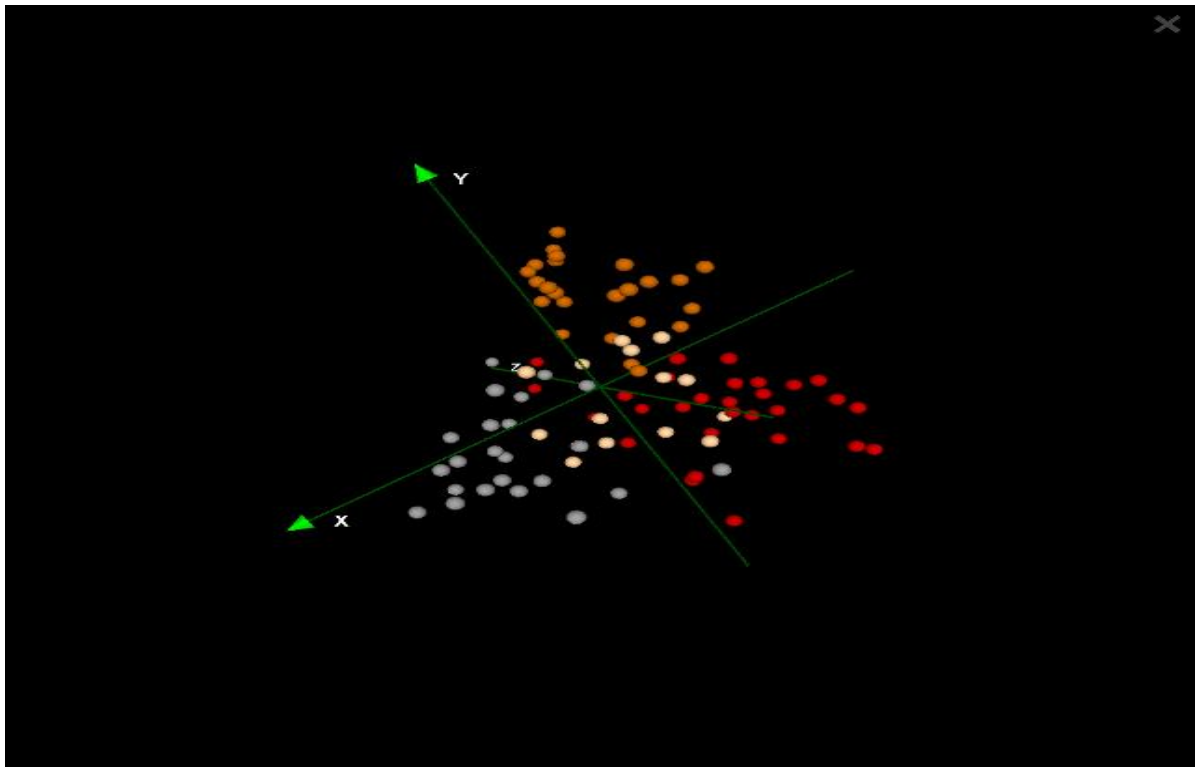

(a)

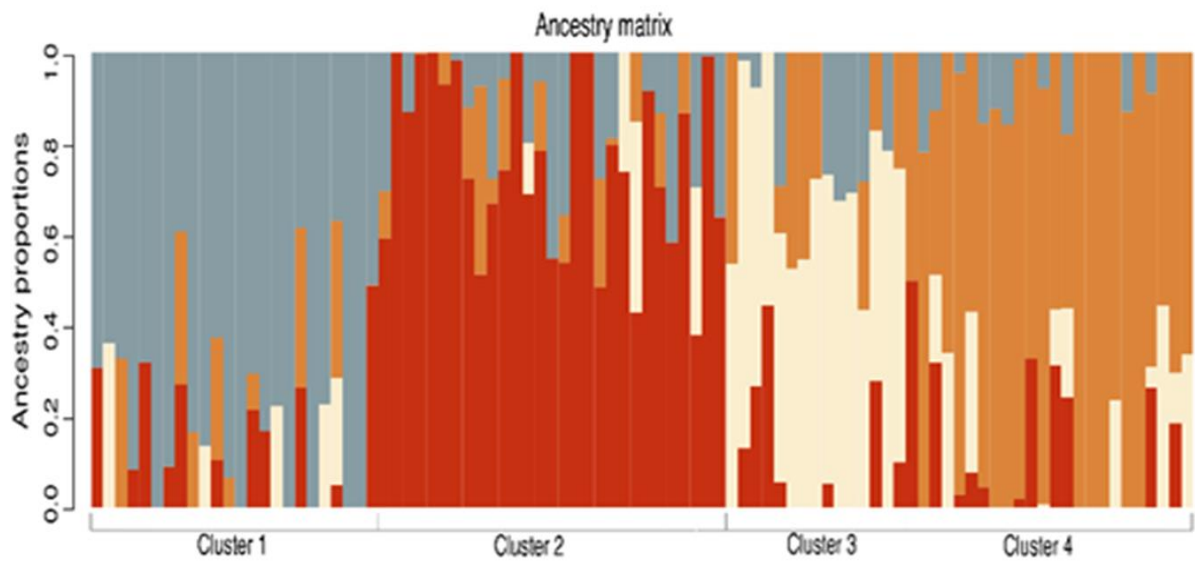

(b)

**Figure S1.** Population structure among 93 spring wheat varieties based on (a) a plot of PC1 (14.2%), PC2 (8.7%), and PC3 (4.3%) from principal component analysis; (b) for comparison purpose, the population structure based on STRUCTURE is provided, which has been published in Kiseleva et al. [29].
