# Supplementary material for: Identification of QTLs for Grain Protein Content in Russian Spring Wheat Varieties
Source: MDPI journal article supplement (doi:10.3390/plants11030437), 2022-02-05
Supplement: s1 [file s1]

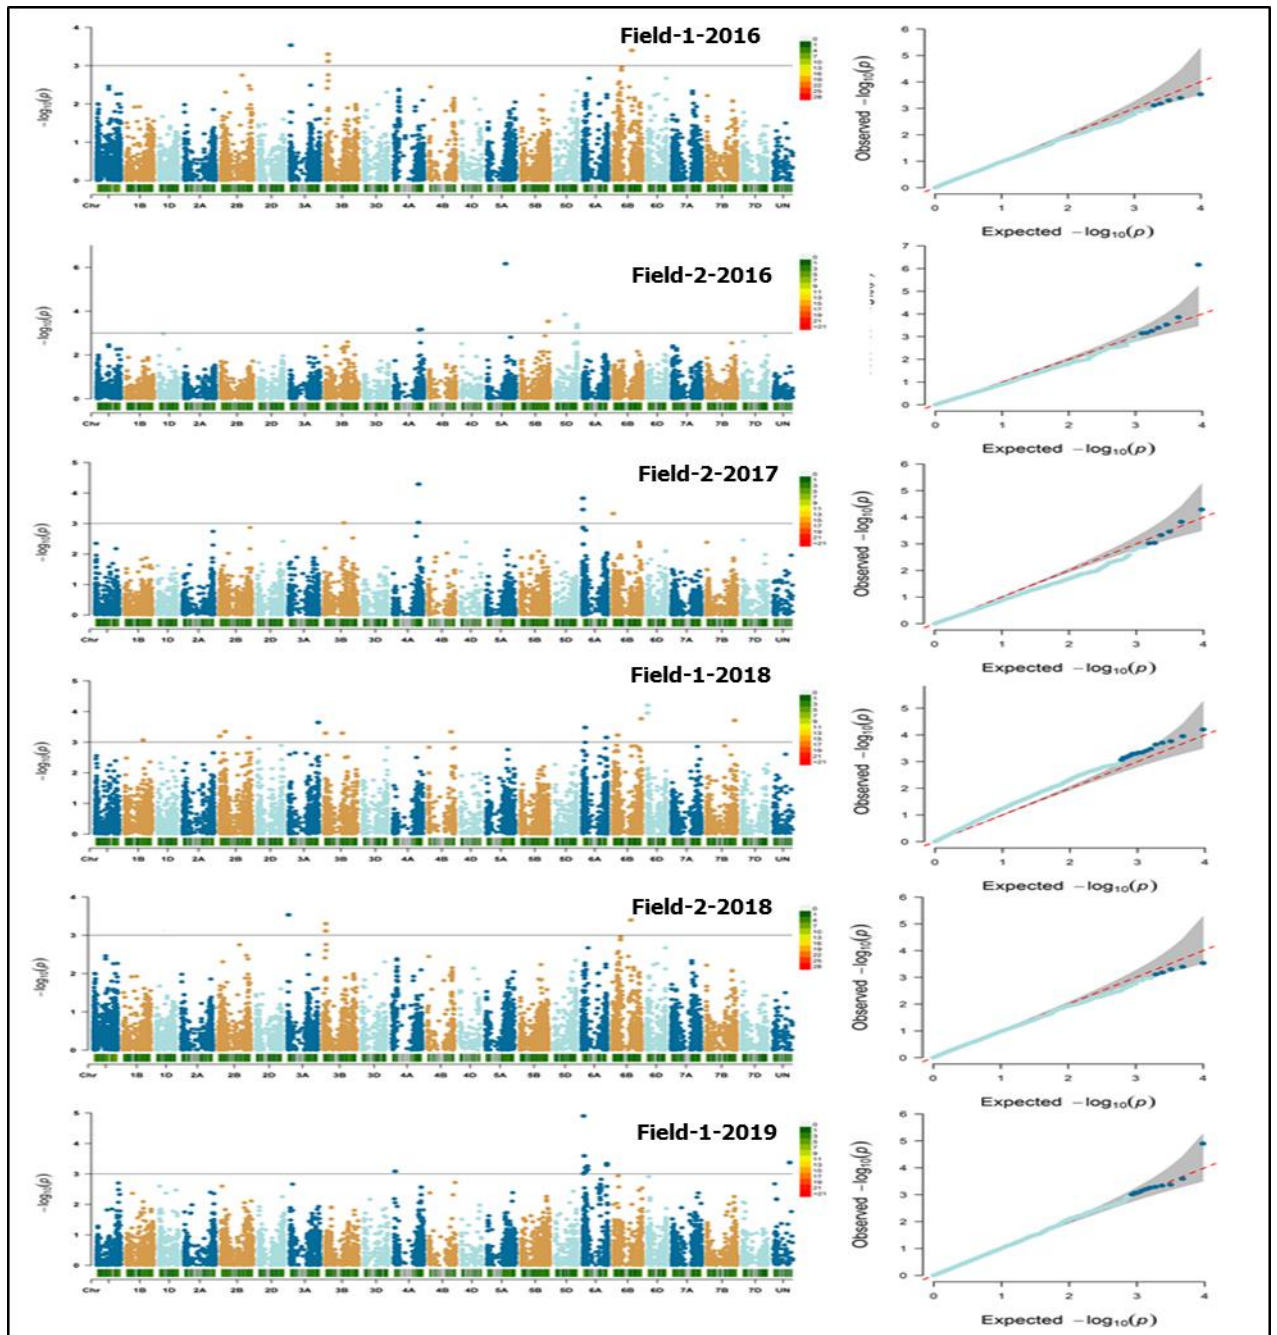

**Figure S2.** Manhattan and QQ-plots based on genome-wide association mapping of grain protein content recorded in 93 spring wheat varieties at six location x year combinations (environments).
