# Supplementary material for: Identification of QTLs for Grain Protein Content in Russian Spring Wheat Varieties
Source: Plants (Basel). 2022 Feb 5;11(3):437. doi: 10.3390/plants11030437 (PMC8840037; doi:10.3390/plants11030437)
Supplement: Supplementary file 1 [file plants-11-00437-s001.zip › Supplementary tables.xlsx]

## Sheet: Table S1
Table S1. Summary of the grain protein content (%) data recorded in 93 spring wheat varieties evaluated between 2016 and 2019 at Field-1 and Field-2 (six environments in total).
No	Varieties	Accession no. VIR*	Region/Originator	Status	Year of release	Field-1			Field-2			Mean	Median	Min	Max	Variance	Std. dev.	Std. err
						2016	2018	2019	2016	2017	2018
1	Kuibyshevskaya-2	K-58028	Samarskaya Oblast / Samarskii NIISKH	Cultivar	1988	13.4	15.2	14.3	17.7	16.5	12.7	14.97	14.75	12.7	17.7	3.59	1.89	0.77
2	Lutescens-840	K-59474		Breeding line	1987	10.66	13.1	12.8	16.8	16.66	11.65	13.61	12.95	10.66	16.8	6.59	2.57	1.05
3	Samsar	K-60905; K-64648		Cultivar	1994	14.08	17.17	17.9	16.47	17.63	16.9	16.69	17.04	14.08	17.9	1.9	1.38	0.56
4	Tulaikovskaya-belozernaya	K-62641		Cultivar	1995	11.8	12.11	13.9	13.2	15.24	12.61	13.14	12.91	11.8	15.24	1.63	1.28	0.52
5	Tulaikovskaya-stepnaya	K-62642		Cultivar	1998	10.09	14.6	14.1	14.77	16.53	12.17	13.71	14.35	10.09	16.53	5.1	2.26	0.92
6	Tulaikovskaya-zolotistaya	K-63715		Cultivar	2006	17.1	16.24	17.8	17	17.93	16.15	17.04	17.05	16.15	17.93	0.56	0.75	0.31
7	Tulaikovskaya-1	K-64256		Cultivar	1994	14.54	13.28	14.3	13.67	14.47	12.85	13.85	13.98	12.85	14.54	0.48	0.7	0.28
8	Tulaikovskaya-10	K-63714		Cultivar	2003	13.97	16.8	16.3	15.9	16.54	14.42	15.65	16.1	13.97	16.8	1.39	1.18	0.48
9	Kinelskaya-40	K-60544		Breeding line	1975	13.4	13.89	15	17.57	15.81	13.39	14.84	14.45	13.39	17.57	2.7	1.64	0.67
10	Kinelskaya-60	K-62643		Cultivar	1998	13.97	14.81	16.6	14.13	15.99	15.35	15.14	15.08	13.97	16.6	1.08	1.04	0.42
11	Volgouralskaya	K-62930		Cultivar	2001	11.23	13.62	14.3	13.65	15.59	12.77	13.53	13.64	11.23	15.59	2.15	1.47	0.6
12	Lutescens-80	K-63452	Altaiskii Krai / Altaiskii NIIZIS	Breeding line	-	13.97	14.75	14.2	15.73	15.74	12.8	14.53	14.48	12.8	15.74	1.28	1.13	0.46
13	Lutescens-85	K-63453		Breeding line	-	11.12	13.46	13.8	12.43	15.18	12.36	13.06	12.95	11.12	15.18	1.97	1.4	0.57
14	Lutescens-148	K-63454		Breeding line	-	12.26	13.69	15.6	14.4	15.63	14.29	14.31	14.35	12.26	15.63	1.6	1.27	0.52
15	Altaiskii-prostor	K-64454		Cultivar	1997	17.1	15.19	17.1	19.3	18.67	16.02	17.23	17.1	15.19	19.3	2.4	1.55	0.63
16	Altaiskaya-92	K-64693		Cultivar	1997	12.26	14.86	15.7	15.23	17.5	14.7	15.04	15.05	12.26	17.5	2.89	1.7	0.69
17	Altaiskaya-99	K-64456		Cultivar	2005	11.4	13.87	14.2	13.95	16.1	12.71	13.7	13.91	11.4	16.1	2.47	1.57	0.64
18	Altaiskaya-100	K-64661		Cultivar	2005	11.12	13.3	15.1	12.93	14.99	13.24	13.45	13.27	11.12	15.1	2.17	1.47	0.6
19	Altaiskaya-325	K-64373		Cultivar	2004	15.96	15.5	16.8	14.47	17.37	15.47	15.93	15.73	14.47	17.37	1.07	1.03	0.42
20	Altaiskaya-530	K-64662		Cultivar	2007	13.4	12.67	15.4	13.27	16.85	13.42	14.17	13.41	12.67	16.85	2.59	1.61	0.66
21	Erythrospermum-72	K-63456		Breeding line	-	15.22	12.93	14.7	15.9	15.75	13.36	14.64	14.96	12.93	15.9	1.54	1.24	0.51
22	Sibirskaya-12	K-64668	Novosibirskaya Oblast / SibNIIRS	Cultivar	2006	13.97	12.89	16.9	15.68	17.25	15.4	15.35	15.54	12.89	17.25	2.81	1.68	0.68
23	Novosibirskaya-15	K-64257		Cultivar	2003	16.25	15.13	18	18.99	18.63	16.68	17.28	17.34	15.13	18.99	2.26	1.5	0.61
24	Novosibirskaya-22	K-58147		Cultivar	1991	17.1	16.11	17.9	17.28	20.04	16.79	17.54	17.19	16.11	20.04	1.85	1.36	0.56
25	Novosibirskaya-29	K-64258		Cultivar	2003	15.96	14.41	14.5	14.76	15.12	13.19	14.66	14.63	13.19	15.96	0.83	0.91	0.37
26	Novosibirskaya-67	K-48601		Cultivar	1974	13.4	11.94	15.1	13.23	15.11	13.47	13.71	13.43	11.94	15.11	1.48	1.22	0.5
27	Novosibirskaya-81	K-55582; K-59460		Cultivar	1986	12.03	13.77	16.3	14.82	15.37	14.82	14.52	14.82	12.03	16.3	2.17	1.47	0.6
28	Novosibirskaya-89	K-61004		Cultivar	1993	17.1	12.62	16.1	17.93	16.66	14.57	15.83	16.38	12.62	17.93	3.74	1.93	0.79
29	Novosibirskaya-91	K-64859		Cultivar	2002	11.4	13.32	16.5	14.63	14.87	14.91	14.27	14.75	11.4	16.5	3	1.73	0.71
30	Lutescens-25	K-58442		Cultivar	1990	15.96	14.09	16.6	16.97	17.32	14.92	15.97	16.28	14.09	17.32	1.57	1.25	0.51
31	Obskaya-14	K-64363		Cultivar	1990	13.22	13.18	15.1	14.68	15.07	13.84	14.18	14.26	13.18	15.1	0.78	0.89	0.36
32	Kantegirskaya-89	K-62317		Cultivar	1993	13.22	12.74	16.1	16.56	17.44	14.95	15.17	15.52	12.74	17.44	3.54	1.88	0.77
33	Aleksandrina	K-64855		Cultivar	2007	15.96	14.88	13.8	16.5	16.23	15.35	15.45	15.66	13.8	16.5	1.01	1	0.41
34	Udacha	K-64372		Cultivar	2006	14.82	12.46	16.7	14.4	14.2	12.34	14.15	14.3	12.34	16.7	2.63	1.62	0.66
35	Polushko	K-64856		Cultivar	2008	10.94	15.43	16.7	17.47	18.3	15.01	15.64	16.07	10.94	18.3	6.81	2.61	1.07
36	Baganskaya-93	K-64467		Cultivar	1999	14.82	16.51	16.4	16.57	18.1	14.73	16.19	16.46	14.73	18.1	1.59	1.26	0.52
37	Sirena	K-61519	Krasnoyarskii krai / Krasnoyarskii NIISKH	Cultivar	1992	13.68	13.35	15.4	14.17	17.17	14.42	14.7	14.29	13.35	17.17	1.96	1.4	0.57
38	Krasa-2	K-64471		Cultivar	2002	13.4	13.48	15.6	14.99	15.42	14.12	14.5	14.55	13.4	15.6	0.94	0.97	0.4
39	Krasnoyarskaya-90	K-61216		Cultivar	1991	11.69	14.65	15.9	15.43	17.82	14.48	14.99	15.04	11.69	17.82	4.06	2.02	0.82
40	Vesnyanka-8	K-63065		Cultivar	1990	15.11	13.8	17.8	16.53	17.18	16.08	16.08	16.31	13.8	17.8	2.1	1.45	0.59
41	Albidum-73	K-60534		Cultivar	1963	13.68	12.11	15.5	15.83	14.41	13.33	14.14	14.04	12.11	15.83	1.96	1.4	0.57
42	Rybinskaya-127	K-60536		Cultivar	1990	9.69	12.8	17	15	16.85	14.99	14.39	15	9.69	17	7.64	2.76	1.13
43	Kazachka	K-64114		Cultivar	2001	12.26	13.58	15.7	16.27	16.35	14.31	14.74	15.01	12.26	16.35	2.71	1.65	0.67
44	Angarida	K-64116		Cultivar	2002	13.4	14.81	15.6	13.77	14.57	13.49	14.27	14.17	13.4	15.6	0.75	0.87	0.35
45	Mana-2	K-64115		Cultivar	2005	13.11	13.68	15.6	13.5	15.51	14.34	14.29	14.01	13.11	15.6	1.12	1.06	0.43
46	Tuleevskaya	K-63461	Kemerovskaya Oblast / Kemerovskii NIISKH	Cultivar	2002	12.08	14.38	15.5	14.03	16.12	14.17	14.38	14.27	12.08	16.12	1.94	1.39	0.57
47	Izida	K-64457		Cultivar	2002	13.97	13.67	15.7	15.28	16.55	14.61	14.96	14.95	13.67	16.55	1.19	1.09	0.44
48	Mariya	K-63200		Cultivar	1999	15.11	15.04	16.7	14.77	17.1	14.78	15.58	15.07	14.77	17.1	1.08	1.04	0.42
49	AN-34	K-63720		Cultivar	2002	14.54	14.29	15.4	16.03	16.66	13.8	15.12	14.97	13.8	16.66	1.21	1.1	0.45
50	Mariinka	K-63718		Cultivar	2006	14.82	15.81	16	16.27	17.58	15.04	15.92	15.91	14.82	17.58	0.98	0.99	0.4
51	Salimovka	K-63719		Cultivar	2001	15.11	14.81	17.7	18.43	18.18	16.98	16.87	17.34	14.81	18.43	2.44	1.56	0.64
52	Kiiskaya	-		Breeding line	2001	15.39	13.51	15.6	15.63	16.84	14.17	15.19	15.5	13.51	16.84	1.39	1.18	0.48
53	Nostalgiya	K-63721		Cultivar	2001	12.83	12.77	15.6	14.12	15.42	14.16	14.15	14.14	12.77	15.6	1.47	1.21	0.5
54	Aleshina	K-63199		Cultivar	2003	13.68	15.93	16.6	15.7	15.97	15.3	15.53	15.82	13.68	16.6	1	1	0.41
55	Darnitsa	K-64659		Cultivar	2008	13.68	13.33	15.6	15.8	14.86	13.94	14.53	14.4	13.33	15.8	1.08	1.04	0.42
56	Serebrina	K-64695	Tyumenskaya Oblast / NIISKH Severnogo Zauralya	Cultivar	2000	14.54	12.95	15	13.1	15.13	13.54	14.04	14.04	12.95	15.13	0.94	0.97	0.39
57	Rechka	K-64370		Cultivar	2000	14.25	12.39	15.9	14.63	16.16	14.31	14.61	14.47	12.39	16.16	1.84	1.36	0.55
58	Latona	K-64359		Cultivar	2000	12.54	13.37	15.4	14.37	15.86	14.05	14.26	14.21	12.54	15.86	1.53	1.24	0.5
59	Provintsiya	K-64999		Cultivar	2002	14.82	13.75	17.6	16.7	17.21	16.51	16.1	16.61	13.75	17.6	2.23	1.49	0.61
60	Bel	K-64664		Cultivar	2008	12.65	15.72	16.2	15.93	17.81	14.87	15.53	15.83	12.65	17.81	2.91	1.71	0.7
61	Ustya	K-62939		Cultivar	1999	14.25	13.78	17.1	13.8	17.52	15.66	15.35	14.96	13.78	17.52	2.78	1.67	0.68
62	Chernyava-13	K-62938		Cultivar	2000	14.54	14.1	15.3	15.7	16.62	13.77	15	14.92	13.77	16.62	1.15	1.07	0.44
63	Zlatozara	K-62937		Cultivar	1999	15.39	13.89	16.8	15.89	17.01	15.35	15.72	15.64	13.89	17.01	1.29	1.14	0.46
64	Tyumenskaya-99	K-64368		Cultivar	2000	15.68	14.69	16.8	15.79	17.22	15.23	15.9	15.73	14.69	17.22	0.9	0.95	0.39
65	Ikar	K-64255		Cultivar	2001	15.39	13.54	16.2	15.25	16.09	14.49	15.16	15.32	13.54	16.2	1.02	1.01	0.41
66	Skent-1	K-64365		Cultivar	1998	14.25	13.03	15.5	14.8	15.58	13.64	14.47	14.53	13.03	15.58	1.04	1.02	0.42
67	Ilinskaya	K-64366		Cultivar	1997	13.4	12.44	14.8	14.1	15.76	13.99	14.08	14.05	12.44	15.76	1.3	1.14	0.47
68	Turinskaya	K-64367		Cultivar	1995	13.97	13.15	14.3	12.47	15.85	12.32	13.68	13.56	12.32	15.85	1.76	1.32	0.54
69	Surenta-1	K-64360		Cultivar	2000	14.82	14.44	16.8	16.3	18.05	15.77	16.03	16.04	14.44	18.05	1.76	1.33	0.54
70	Surenta-4	K-64375		Cultivar	2002	12.65	14.3	15.8	15.33	15.44	14.39	14.65	14.86	12.65	15.8	1.32	1.15	0.47
71	Surenta-5	K-64376		Cultivar	2002	12.54	13.81	14.8	13.85	15.55	13	13.92	13.83	12.54	15.55	1.24	1.11	0.45
72	Surenta-6	K-64465		Cultivar	2003	10.94	13.22	14.8	16.6	15.94	13.36	14.14	14.08	10.94	16.6	4.28	2.07	0.84
73	Surenta-7	K-64466		Cultivar	2003	11.4	13.25	14.8	13.88	15.25	13.71	13.71	13.8	11.4	15.25	1.82	1.35	0.55
74	Dias-2	K-59025	Omskaya Oblast / Sibirskii NIISKH	Cultivar	1987	10.26	12.91	15.8	14.77	16.68	13.67	14.01	14.22	10.26	16.68	5.26	2.29	0.94
75	Katyusha	K-64665		Cultivar	2008	10.55	15.4	16.5	15.07	16.04	15.24	14.8	15.32	10.55	16.5	4.63	2.15	0.88
76	Tarskaya-6	K-64464		Cultivar	2002	10.66	15.86	17.1	18.43	18.1	16.03	16.03	16.56	10.66	18.43	8.02	2.83	1.16
77	Sonata	K-64691		Cultivar	2002	10.55	14.3	14.8	16.87	14.84	13.26	14.1	14.55	10.55	16.87	4.42	2.1	0.86
78	Strada-Sibiri	K-62944		Cultivar	2002	11.4	14.64	15.4	14.65	15.42	14.37	14.31	14.65	11.4	15.42	2.22	1.49	0.61
79	Otrada-Sibiri	K-62943		Cultivar	1998	11.97	15.87	15	14.83	15.73	13.08	14.41	14.92	11.97	15.87	2.42	1.56	0.64
80	Tertsiya	K-62639		Cultivar	1995	12.26	12.89	12.9	12.91	16.18	12.25	13.23	12.9	12.25	16.18	2.16	1.47	0.6
81	Priirtyshskaya-86	K-63464		Cultivar	1986	13.11	12.45	13.5	13.28	15.46	11.86	13.28	13.2	11.86	15.46	1.51	1.23	0.5
82	Rosinka-2	K-63208		Cultivar	1999	13.11	14.32	15.4	14.07	15.99	13.93	14.47	14.19	13.11	15.99	1.1	1.05	0.43
83	Omskaya-20	K-61189		Cultivar	1993	11.8	14.13	14.6	15.23	15.81	13.31	14.15	14.37	11.8	15.81	2.07	1.44	0.59
84	Omskaya-23	K-64992		Cultivar	1997	14.25	13.76	13.5	15.37	15.66	12.74	14.21	14.01	12.74	15.66	1.26	1.12	0.46
85	Omskaya-24	K-64118		Cultivar	1996	11.12	13.04	14.5	15.4	16.02	12.2	13.71	13.77	11.12	16.02	3.65	1.91	0.78
86	Omskaya-26	K-63201		Cultivar	1998	13.11	13	15.4	15.6	16.15	13.31	14.43	14.36	13	16.15	2.06	1.44	0.59
87	Omskaya-28	K-63202		Cultivar	1997	11.4	12.76	14.8	12.53	15.19	12.89	13.26	12.83	11.4	15.19	2.09	1.45	0.59
88	Omskaya-29	K-63203		Cultivar	1999	10.94	13.36	15	15.27	15.75	13.23	13.92	14.18	10.94	15.75	3.19	1.79	0.73
89	Omskaya-32	K-63205		Cultivar	2001	10.94	13.54	15.3	15.37	15.08	13.83	14.01	14.46	10.94	15.37	2.86	1.69	0.69
90	Omskaya-33	K-63206		Cultivar	2002	11.12	15.02	15.2	13.93	16.58	13.61	14.24	14.48	11.12	16.58	3.45	1.86	0.76
91	Omskaya-34	K-64458		Cultivar	2001	12.54	15.62	16.8	18.13	19.54	15.38	16.34	16.21	12.54	19.54	5.91	2.43	0.99
92	Omskaya-36	K-64667		Cultivar	2007	9.98	15.44	15.7	14.33	15.55	14.59	14.26	15.02	9.98	15.7	4.72	2.17	0.89
93	Saratovskaya-29	K-40599	Saratovskaya Oblast / NIISKH Yugo-Vostoka	Cultivar	1957	-	14.37	14.35	14.8	13.75	13.2	14.09	14.35	13.2	14.8	0.39	0.62	0.28
* VIR - Federal Research Center N.I. Vavilov All-Russian Institute of Plant Genetic Resources, St. Petersburg, Russia; http://db.vir.nw.ru/virdb/maindb?lang=en

## Sheet: Table S2
Table S2. Analysis of variance for grain protein content (GPC), grain weight for spike (GWS) and thousand kernel weight (TKW) in the 93 spring wheat genotypes.
Trait		df	MS	p
GPC	Genotype	92	6	0.0001
	Environment	5	198.9	0.00001
	Field	1	123.2	0.00001
	Geno x Environment	460	121.8	0.00013
GWS	Genotype	92	0.131	0.00012
	Environment	5	0.803	0.00003
	Field	1	3.074	0.0000001
	Geno x Environment	460	0.019	0.079
TKW	Genotype	92	54.46	0.005199
	Environment	5	1215.5	0.0000001
	Field	1	1050.9	0.0000001
	Geno x Environment	460	10	0.37

## Sheet: Table S3
Table S3.	List of SNP markers associated with grain protein content in six environments.
Year	Field	Environment	Marker	Chromosome	Position IWGSC refseq v. 1.0 (Mb)	p	R2 (%)
2018	Field 1	Field 1-2018	BobWhite_c28635_785	1B	465.5893	0.000856	8.9
2018	Field 1	Field 1-2018	Kukri_c40204_617	2B	466.3233	0.000643	8.4
2016	Field 1	Field 1-2016	Excalibur_c8483_1308	3A	20.0199	0.000294	20.2
2018	Field 1	Field 1-2018	Tdurum_contig31235_99	3A	739.3971	0.00023	7.7
2018	Field 1	Field 1-2018	Tdurum_contig46389_1540	3B	29.3561	0.000508	7.7
2016	Field 1	Field 1-2016	Tdurum_contig51993_52	3B	66.9535	0.000772	20.8
2016	Field 1	Field 1-2016	Excalibur_c21372_142	3B	66.9540	0.0005	19.6
2018	Field 1	Field 1-2018	BS00095061_51	3B	455.0656	0.000512	6.5
2017	Field 2	Field 2-2017	BS00036352_51	3B	493.1226	0.000958	31.8
2016	Field 2	Field 2-2016	Excalibur_c4325_1150	4A	684.6164	0.000684	32.2
2017	Field 2	Field 2-2017	BS00039148_51	4A	641.4029	5.13e-05	41.7
2019	Field 1	Field 1-2019	Ku_c3891_395	4A	27.6731	0.000823	25.4
2016	Field 2	Field 2-2016	wsnp_BE403214B_Ta_2_1	5B	682.1704	0.000294	26.5
2016	Field 2	Field 2-2016	Kukri_c8949_906	5D	354.9390	6.79e-07	21.5
2016	Field 2	Field 2-2016	RAC875_c7016_2039	5D	534.0943	0.000706	31.5
2017	Field 2	Field 2-2017	RAC875_c7016_2039	5D	534.0943	0.000924	37.9
2016	Field 2	Field 2-2016	wsnp_Ku_c3022_5674299	5D	548.0246	0.000141	24.6
2016	Field 2	Field 2-2016	wsnp_Ku_c5228_9318604	5D	548.3675	0.000563	24.7
2016	Field 2	Field 2-2016	Excalibur_rep_c104791_725	5D	548.3675	0.000408	24.7
2017	Field 2	Field 2-2017	Tdurum_contig63703_1143*	6A	6.7334	0.00035	38.4
2019	Field 1	Field 1-2019	Tdurum_contig63703_1143	6A	6.7334	0.000977	27.3
2017	Field 2	Field 2-2017	wsnp_Ra_c3996_7334169*	6A	6.7339	0.000149	36.5
2018	Field 2	Field 2-2018	wsnp_Ra_c3996_7334169	6A	6.7339	9.25e-05	28.1
2019	Field 1	Field 1-2019	wsnp_Ra_c3996_7334169	6A	6.7339	1.26e-05	29.4
2018	Field 2	Field 2-2018	BS00065076_51*	6A	23.3720	0.000735	27.1
2019	Field 1	Field 1-2019	BS00065076_51	6A	23.3720	0.000256	25.5
2019	Field 1	Field 1-2019	Kukri_rep_c68344_627	6A	61.0377	0.000852	24.6
2019	Field 1	Field 1-2019	wsnp_CAP7_c1839_908011	6A	61.2126	0.000628	24.6
2018	Field 1	Field 1-2018	wsnp_Ku_c9583_16038698	6A	63.7688	0.00102	21.7
2018	Field 1	Field 1-2018	Excalibur_c6057_281	6A	63.7754	0.000334	21.7
2018	Field 1	Field 1-2018	wsnp_Ex_c22089_31270950	6A	64.3162	0.000592	21.7
2018	Field 1	Field 1-2018	wsnp_Ex_c22089_31269531	6A	64.3135	0.000465	21.7
2019	Field 1	Field 1-2019	tplb0032i10_420	6A	103.7601	0.000555	23.1
2019	Field 1	Field 1-2019	BobWhite_c20782_697	6A	107.1132	0.000722	22.3
2018	Field 2	Field 2-2018	wsnp_Ex_c18965_27868480	6A	429.3960	0.000708	31.5
2018	Field 2	Field 2-2018	Excalibur_c49239_97	6A	439.6688	0.000735	31.5
2018	Field 2	Field 2-2018	Excalibur_c34574_452	6A	449.6932	0.000336	34.3
2019	Field 1	Field 1-2019	RAC875_c103443_475	6A	596.9032	0.000516	27.7
2019	Field 1	Field 1-2019	Kukri_rep_c111369_53	6A	597.0316	0.000461	27.7
2018	Field 1	Field 1-2018	Tdurum_contig46670_911	6A	599.0509	0.000705	9.7
2016	Field 1	Field 1-2016	wsnp_Ex_c43809_50018316	6B	207.9279	0.00109	20.4
2016	Field 1	Field 1-2016	wsnp_Ex_c33813_42239400	6B	199.7658	0.000663	21.4
2016	Field 1	Field 1-2016	RFL_Contig3609_1678	6B	465.6760	0.000402	12.8
2017	Field 2	Field 2-2017	BobWhite_rep_c52979_181	6B	9.0023	0.000474	33.9
2018	Field 1	Field 1-2018	wsnp_Ku_c2637_5009091	6D	6.3431	0.000112	11.4
2018	Field 1	Field 1-2018	BS00022523_51	6D	6.2753	0.000197	9.7
2018	Field 1	Field 1-2018	Ra_c42576_780	6D	6.3428	6.3e-05	10.4
2016	Field 1	Field 1-2016	Excalibur_c3810_186	6D	116.9602	0.00109	20.4
2018	Field 1	Field 1-2018	GENE-4008_395	6D	467.9165	0.000172	8
2019	Field 1	Field 1-2019	Excalibur_c55782_55	Unmapped	-	0.000425	18.7
	BS00065076_51, Tdurum_contig63703_1143, and RAC875_c7016_2039 were assocaited with GPC in two environments, while wsnp_Ra_c3996_7334169 in three environments.
	BS00065076_51, Tdurum_contig63703_1143, and wsnp_Ra_c3996_7334169 were detected in both Field 1 and Field 2

## Sheet: Table S4
Table S4. Summary of Triticum aestivum candidate genes that fell between each QTL interval
QTL	QTL interval	Triticum aestivum gene ID	Location
QGpc.icg-6A.1	6A:6733494-6733803	TraesCS6A02G013700 (TraesCS6A02G013700)	6A:6727564-6735295
QGpc.icg-6A.2	6A:61037678-61212495	TraesCS6A02G093300 (TraesCS6A02G093300)	6A:61023823-61039871
QGpc.icg-6A.2	6A:61037678-61212495	TraesCS6A02G093400 (TraesCS6A02G093400)	6A:61136761-61137219
QGpc.icg-6A.2	6A:61037678-61212495	TraesCS6A02G093500 (TraesCS6A02G093500)	6A:61185492-61186208
QGpc.icg-6A.2	6A:61037678-61212495	TraesCS6A02G093600 (TraesCS6A02G093600)	6A:61210055-61210789
QGpc.icg-6A.2	6A:61037678-61212495	TraesCS6A02G093700 (TraesCS6A02G093700)	6A:61211829-61215961
QGpc.icg-6A.3	6A:103760106-107113198	TraesCS6A02G131300 (TraesCS6A02G131300)	6A:103759668-103764125
QGpc.icg-6A.3	6A:103760106-107113198	TraesCS6A02G131400 (TraesCS6A02G131400)	6A:103953684-103959122
QGpc.icg-6A.3	6A:103760106-107113198	TraesCS6A02G131500 (TraesCS6A02G131500)	6A:103972766-103976247
QGpc.icg-6A.3	6A:103760106-107113198	TraesCS6A02G131600 (TraesCS6A02G131600)	6A:104048744-104052693
QGpc.icg-6A.3	6A:103760106-107113198	TraesCS6A02G131700 (TraesCS6A02G131700)	6A:104052315-104057431
QGpc.icg-6A.3	6A:103760106-107113198	TraesCS6A02G131800 (TraesCS6A02G131800)	6A:104079450-104111799
QGpc.icg-6A.3	6A:103760106-107113198	TraesCS6A02G131900 (TraesCS6A02G131900)	6A:104112857-104114229
QGpc.icg-6A.3	6A:103760106-107113198	TraesCS6A02G132000 (TraesCS6A02G132000)	6A:104115108-104119571
QGpc.icg-6A.3	6A:103760106-107113198	TraesCS6A02G132100 (TraesCS6A02G132100)	6A:104124109-104124360
QGpc.icg-6A.3	6A:103760106-107113198	TraesCS6A02G132200 (TraesCS6A02G132200)	6A:104355185-104359483
QGpc.icg-6A.3	6A:103760106-107113198	TraesCS6A02G132300 (TraesCS6A02G132300)	6A:104408108-104410700
QGpc.icg-6A.3	6A:103760106-107113198	TraesCS6A02G132400 (TraesCS6A02G132400)	6A:104411857-104413938
QGpc.icg-6A.3	6A:103760106-107113198	TraesCS6A02G132500 (TraesCS6A02G132500)	6A:104444101-104448319
QGpc.icg-6A.3	6A:103760106-107113198	TraesCS6A02G132600 (TraesCS6A02G132600)	6A:104509201-104515419
QGpc.icg-6A.3	6A:103760106-107113198	TraesCS6A02G132700 (TraesCS6A02G132700)	6A:104531253-104533070
QGpc.icg-6A.3	6A:103760106-107113198	TraesCS6A02G132800 (TraesCS6A02G132800)	6A:105012199-105022853
QGpc.icg-6A.3	6A:103760106-107113198	TraesCS6A02G132900 (TraesCS6A02G132900)	6A:105168155-105168616
QGpc.icg-6A.3	6A:103760106-107113198	TraesCS6A02G133000 (TraesCS6A02G133000)	6A:105178184-105182624
QGpc.icg-6A.3	6A:103760106-107113198	TraesCS6A02G133100 (TraesCS6A02G133100)	6A:105558498-105560275
QGpc.icg-6A.3	6A:103760106-107113198	TraesCS6A02G133200 (TraesCS6A02G133200)	6A:105586003-105586104
QGpc.icg-6A.3	6A:103760106-107113198	TraesCS6A02G133300 (TraesCS6A02G133300)	6A:105591720-105594216
QGpc.icg-6A.3	6A:103760106-107113198	TraesCS6A02G133400 (TraesCS6A02G133400)	6A:105594092-105611646
QGpc.icg-6A.3	6A:103760106-107113198	TraesCS6A02G133500 (TraesCS6A02G133500)	6A:105637443-105638989
QGpc.icg-6A.3	6A:103760106-107113198	TraesCS6A02G133600 (TraesCS6A02G133600)	6A:105841587-105842154
QGpc.icg-6A.3	6A:103760106-107113198	TraesCS6A02G133700 (TraesCS6A02G133700)	6A:105870784-105872877
QGpc.icg-6A.3	6A:103760106-107113198	TraesCS6A02G133800 (TraesCS6A02G133800)	6A:106059174-106059443
QGpc.icg-6A.3	6A:103760106-107113198	TraesCS6A02G133900 (TraesCS6A02G133900)	6A:106079323-106080871
QGpc.icg-6A.3	6A:103760106-107113198	TraesCS6A02G134000 (TraesCS6A02G134000)	6A:106455121-106457146
QGpc.icg-6A.3	6A:103760106-107113198	TraesCS6A02G134100 (TraesCS6A02G134100)	6A:106478180-106480357
QGpc.icg-6A.3	6A:103760106-107113198	TraesCS6A02G134200 (TraesCS6A02G134200)	6A:106698115-106700184
QGpc.icg-6A.3	6A:103760106-107113198	TraesCS6A02G134300 (TraesCS6A02G134300)	6A:106734660-106736705
QGpc.icg-6A.3	6A:103760106-107113198	TraesCS6A02G134400 (TraesCS6A02G134400)	6A:106798137-106801313
QGpc.icg-6A.3	6A:103760106-107113198	TraesCS6A02G134500 (TraesCS6A02G134500)	6A:106878295-106879256
QGpc.icg-6A.3	6A:103760106-107113198	TraesCS6A02G134600 (TraesCS6A02G134600)	6A:106894183-106895421
QGpc.icg-6A.3	6A:103760106-107113198	TraesCS6A02G134700 (TraesCS6A02G134700)	6A:106929712-106936563
QGpc.icg-6A.3	6A:103760106-107113198	TraesCS6A02G134900 (TraesCS6A02G134900)	6A:106981919-106986291
QGpc.icg-6A.3	6A:103760106-107113198	TraesCS6A02G135000 (TraesCS6A02G135000)	6A:107011379-107011849
QGpc.icg-6A.3	6A:103760106-107113198	TraesCS6A02G135100 (TraesCS6A02G135100)	6A:107111934-107113379
QGpc.icg-6A.4	6A:596903177-597031623	TraesCS6A02G374100 (TraesCS6A02G374100)	6A:596905198-596912689
QGpc.icg-6A.4	6A:596903177-597031623	TraesCS6A02G374200 (TraesCS6A02G374200)	6A:597030530-597034221

## Sheet: Table S5
Table S5. Allelic polymorphism of NAM-A1 gene in spring wheat varieties.
Cultivar	NAM_A1_SNP1	NAM_A1_SNP2	NAM_A1_allele
Kuibyshevskaya-2	TT	AA	NAM-A1c
Lutescens-840	TT	Del	NAM-A1d
Samsar	TT	AA	NAM-A1c
Tulaikovskaya-belozernaya	TT	Del	NAM-A1d
Tulaikovskaya-stepnaya	TT	AA	NAM-A1c
Tulaikovskaya-zolotistaya	CC	AA	NAM-A1a
Tulaikovskaya-1	TT	Del	NAM-A1d
Tulaikovskaya-10	TT	AA	NAM-A1c
Kinelskaya-40	TT	Del	NAM-A1d
Kinelskaya-60	TT	Del	NAM-A1d
Volgouralskaya	TT	AA	NAM-A1c
Lutescens-80	TT	AA	NAM-A1c
Lutescens-85	TT	AA	NAM-A1c
Lutescens-148	TT	AA	NAM-A1c
Altaiskii-prostor	TT	AA	NAM-A1c
Altaiskaya-92	TT	AA	NAM-A1c
Altaiskaya-99	TT	Del	NAM-A1d
Altaiskaya-100	TT	AA	NAM-A1c
Altaiskaya-325	TT	AA	NAM-A1c
Altaiskaya-530	TT	Del	NAM-A1d
Erythrospermum-72	TT	AA	NAM-A1c
Sibirskaya-12	TT	AA	NAM-A1c
Novosibirskaya-15	TT	AA	NAM-A1c
Novosibirskaya-22	CC	AA	NAM-A1a
Novosibirskaya-29	TT	Del	NAM-A1d
Novosibirskaya-67	CC	AA	NAM-A1a
Novosibirskaya-81	ТT	Del	NAM-A1d
Novosibirskaya-89	TT	Del	NAM-A1d
Novosibirskaya-91	TT	Del	NAM-A1d
Lutescens-25	TT	AA	NAM-A1c
Obskaya-14	TT	Del	NAM-A1d
Kantegirskaya-89	TT	AA	NAM-A1c
Aleksandrina	TT	AA	NAM-A1c
Udacha	TT	AA	NAM-A1c
Polushko	TT	AA	NAM-A1c
Baganskaya-93	TT	AA	NAM-A1c
Sirena	CC	AA	NAM-A1a
Krasa-2	TT	AA	NAM-A1c
Krasnoyarskaya-90	TT	AA	NAM-A1c
Vesnyanka-8	TT	AA	NAM-A1c
Albidum-73	TT	Del	NAM-A1d
Rybinskaya-127	TT	Del	NAM-A1d
Kazachka	TT	Del	NAM-A1d
Angarida	TT	AA	NAM-A1c
Mana-2	TT	AA	NAM-A1c
Tuleevskaya	TT	Del	NAM-A1d
Izida	TT	Del	NAM-A1d
Mariya	TT	AA	NAM-A1c
AN_34	TT	AA	NAM-A1c
Mariinka	TT	AA	NAM-A1c
Salimovka	TT	AA	NAM-A1c
Kiiskaya	TT	Del	NAM-A1d
Nostalgiya	TT	Del	NAM-A1d
Aleshina	TT	Del	NAM-A1d
Darnitsa	TT	Del	NAM-A1d
Serebrina	TT	AA	NAM-A1c
Rechka	TT	Del	NAM-A1d
Latona	TT	AA	NAM-A1c
Provintsiya	TT	AA	NAM-A1c
Bel	TT	AA	NAM-A1c
Ustya	TT	AA	NAM-A1c
Chernyava-13	TT	AA	NAM-A1c
Zlatozara	TT	AA	NAM-A1c
Tyumenskaya-99	TT	AA	NAM-A1c
Ikar	TT	AA	NAM-A1c
Skent_1	TT	AA	NAM-A1c
Ilinskaya	TT	Del	NAM-A1d
Turinskaya	TT	AA	NAM-A1c
Surenta-1	TT	AA	NAM-A1c
Surenta-4	TT	AA	NAM-A1c
Surenta-5	TT	Del	NAM-A1d
Surenta-6	TT	Del	NAM-A1d
Surenta-7	TT	AA	NAM-A1c
Dias-2	TT	AA	NAM-A1c
Katyusha	CC	AA	NAM-A1a
Tarskaya-6	TT	AA	NAM-A1c
Sonata	TT	Del	NAM-A1d
Strada-Sibiri	TT	Del	NAM-A1d
Otrada-Sibiri	TT	AA	NAM-A1c
Tertsiya	TT	AA	NAM-A1c
Priirtyshskaya-86	TT	no data	no data
Rosinka-2	TT	AA	NAM-A1c
Omskaya-20	TT	AA	NAM-A1c
Omskaya-23	TT	Del	NAM-A1d
Omskaya-24	TT	AA	NAM-A1c
Omskaya-26	TT	Del	NAM-A1d
Omskaya-28	TT	Del	NAM-A1d
Omskaya-29	TT	AA	NAM-A1c
Omskaya-32	TT	AA	NAM-A1c
Omskaya-33	TT	AA	NAM-A1c
Omskaya-34	TT	AA	NAM-A1c
Omskaya-36	TT	AA	NAM-A1c
Saratovskaya-29	TT	Del	NAM-A1d
